# Supplementary material for: Ripening-associated ethylene biosynthesis in tomato fruit is autocatalytically and developmentally regulated
Source: PubMed Central journal article supplement — J Exp Bot. 2009 Jul 15;60(12):3433–42. doi: 10.1093/jxb/erp185 (PMC2724697; doi:10.1093/jxb/erp185), 2009-07-15
Supplement: erp185_1.pdf [file erp185_1.pdf]

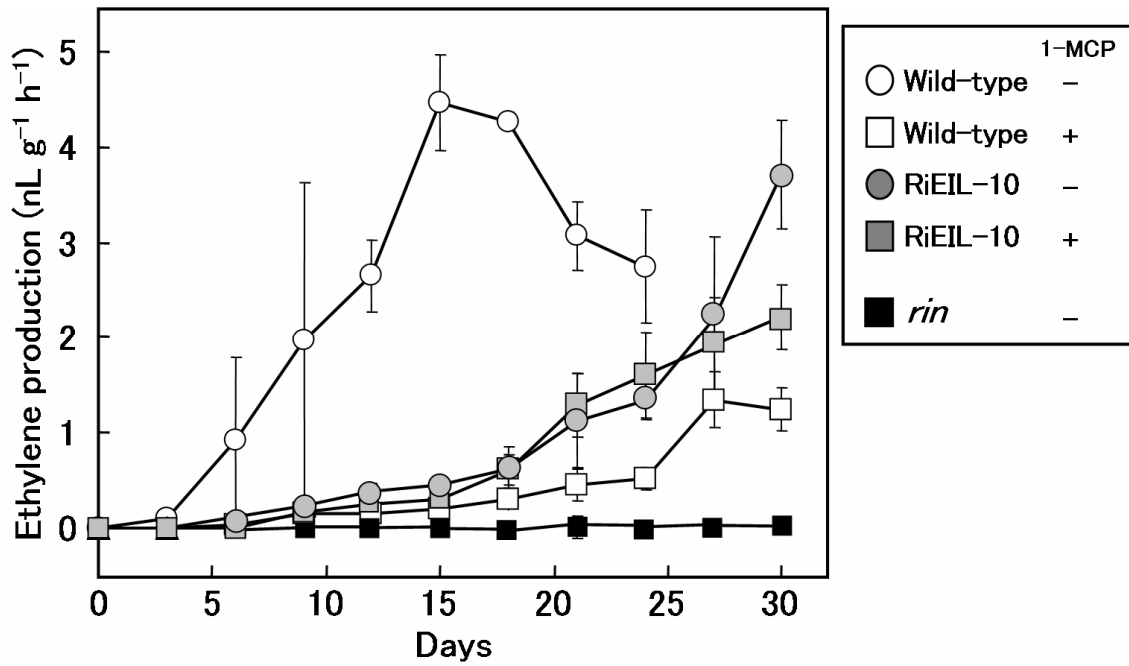

**Fig. S1.** Changes in the rate of ethylene production in wild-type and *RiEIL-10* fruit. Tomato fruits were harvested 35 days after anthesis and continuously treated with (+) or without (-) 1-MCP. Vertical bars are SE of three replications.

Table S1 Primers used

| for DIG probe              | Forward                    | Reverse                      |
|----------------------------|----------------------------|------------------------------|
| LeEIL1                     | GCGAGTTTCTTCAATGCCCTC      | CACCATAACTAAGAGGACTAT        |
| LeEIL2                     | GCGAGTGTCTTCATTGCCCTC      | ACCAGCAGCATGACATCTTACTACTCCC |
| LeEIL3                     | GTGAGTACCTTCACTGCCCA       | GTGTTTAGCACTTACAACCATGG      |
| LeEIL4                     | GTCCTTACAGTGAACCTCGCCACGG  | CCATGCCGCCTAGCTTTCAACCCTC    |
| for real-time PCR analysis | Forward                    | Reverse                      |
| LeACS1A                    | AGTACTTTGTGCTTCAGCCAAAGGG  | AGTCCTGACCAAAGGCGAATTCATCGG  |
| LeACS2                     | CGAGGATTCGGAGGTTTCGTAGGTGT | GGTGAGGGAGGAATAGGTGACGAAAG   |
| LeACS4                     | GCAAGGATTCGGATGTTTATGGATGC | TGCTCGCACTACGAGCGAGGAATTG    |
| LeACS6                     | TTTACAACCAAATAAGGGAGTTGAAG | ATAGGAGAAGACATAGGTGAATGAGG   |
| LeEF1                      | GCCCAGAAGAAGGGGAAGTGAAGT   | TCGCCACCGCCTATCAAGTACCCAG    |
